# Supplementary material for: Prediction of organic groundwater contaminant degradation during medium pressure UV/NO3− treatment
Source: Royal Society of Chemistry journal article supplement (doi:10.1039/d3ew00102d), 2023-01-01
Supplement: d3ew00102d1.pdf [file d3ew00102d1.pdf]

1    **Supporting Information:** *Prediction of organic contaminants degradation during*  
2    *medium pressure UV/NO<sub>3</sub> treatment of groundwater*

3    Lidori Edri<sup>a</sup>, Nadeem Ibrahim<sup>a</sup>, Karl G Linden<sup>b</sup>, Dror Avisar<sup>c</sup>, Aviv Kaplan<sup>c</sup>, Sarah hayoune<sup>a</sup>,  
4    Yaal Lester<sup>a\*</sup>

5  
6    <sup>a</sup> Environmental Technologies, Department of Materials Engineering, Azrieli College of  
7    Engineering, Jerusalem 9103501, Israel

8    <sup>b</sup> Department of Civil, Environmental, and Architectural Engineering, University of Colorado  
9    Boulder, Boulder, Colorado 80303, United States

10    <sup>c</sup> The Water Research Center, Porter School for Environment and Earth Sciences, Faculty of  
11    Exact Sciences, Tel Aviv University, Tel Aviv 69978, Israel; avivkaplan@tauex.tau.ac.il

12

13    \*Corresponding Authors Email: yaalle@jce.ac.il

14

15    This PDF file has 6 pages and includes 1 text and 4 figures.

16

17

18

19

20

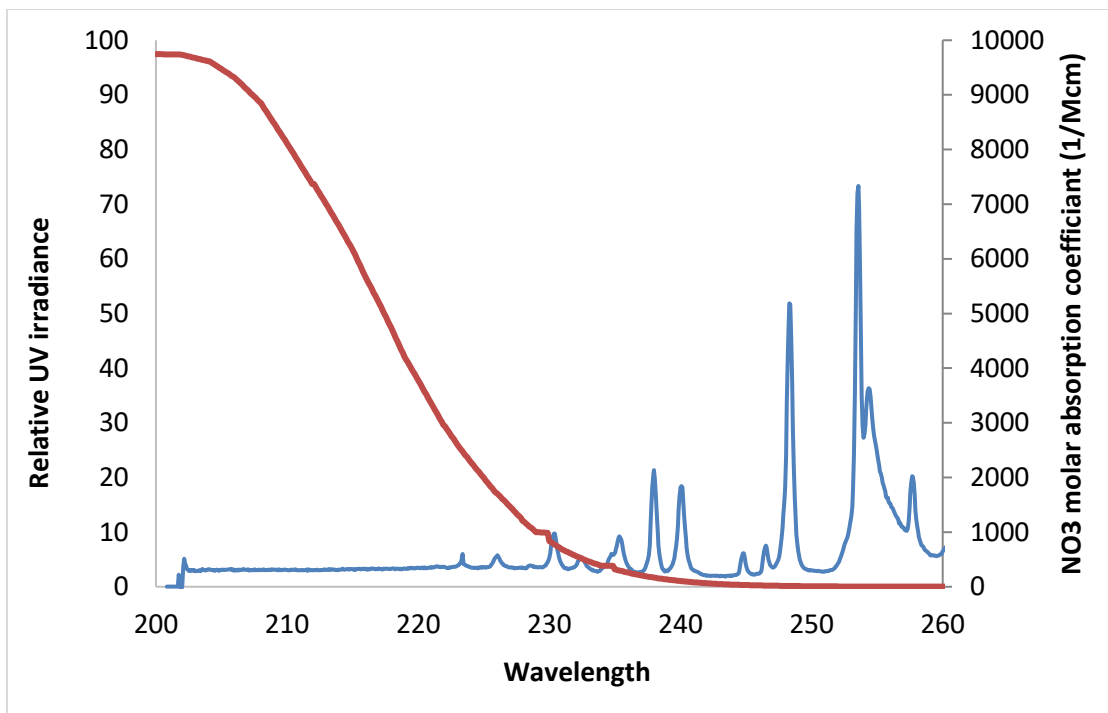

21

22 **Figure S1.** Relative spectral irradiance of the medium-pressure mercury UV lamp and molar  
23 absorption coefficient of  $\text{NO}_3^-$   
24

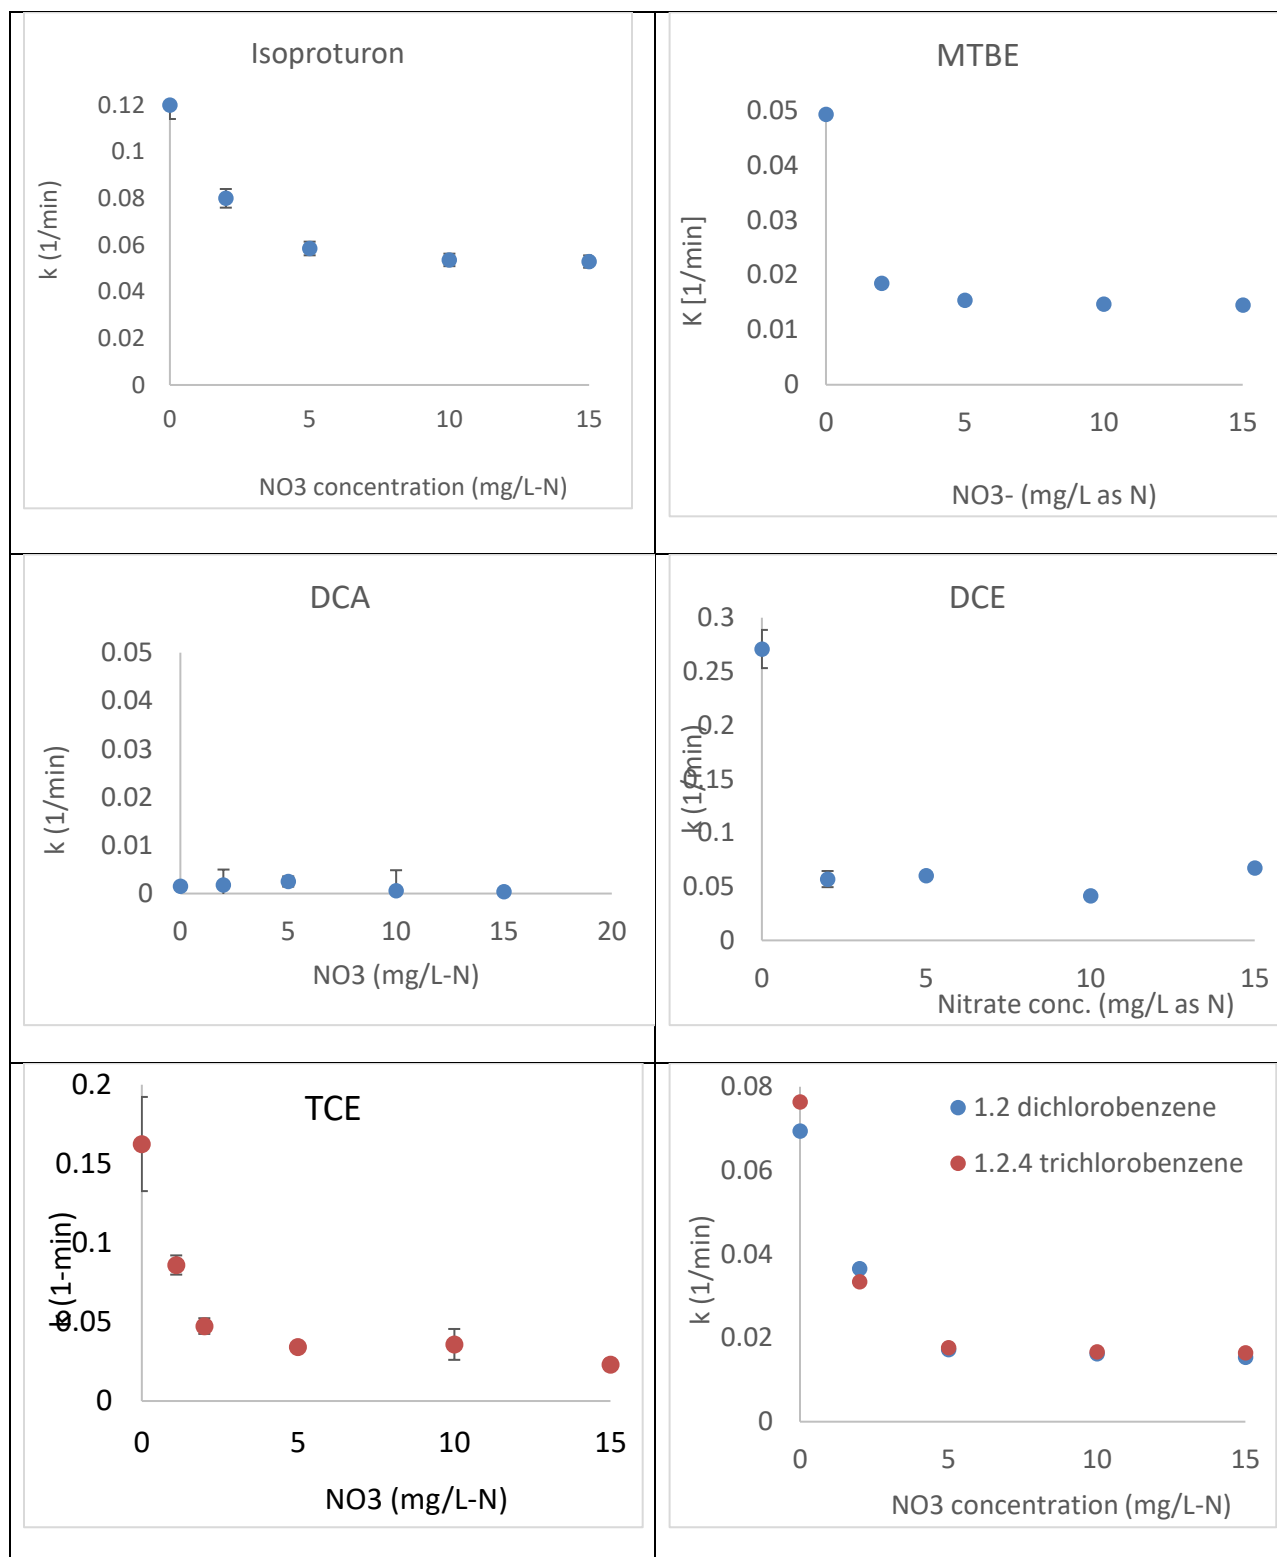

25 **Figure S2.** First order degradation rate constant vs.  $\text{NO}_3$  concentration for the tested compounds.

26

27 **Text S1. Modeling the impact of NO<sub>3</sub><sup>-</sup> on UV degradation of Group II contaminants**

28 Compounds belonging to Group II are characterized by high direct photolysis ( $k_{UV} > 2 \times 10^{-4}$   
29  $\text{cm}^2/\text{mJ}$ ) and high reaction rate with  $\bullet\text{OH}$  ( $k_{\bullet\text{OH},C} > 1 \times 10^9$  1/Ms). To model their degradation  
30 kinetics, we used the general equations below:

31 
$$-\frac{d[C]}{dt} = k'_d[C] + k'_{\bullet\text{OH}}[C] \Rightarrow k_{tot} = k'_d + k'_{\bullet\text{OH}} \quad (\text{S1})$$

32 
$$k'_d = \sum_{\lambda} E_{avg}^P(\lambda) \varepsilon(\lambda) \Phi(\lambda) \times 1000 \quad (\text{S2})$$

33 
$$k'_{\bullet\text{OH}} = [\bullet\text{OH}]_{ss} k_{\bullet\text{OH},C} \quad (\text{S3})$$

34 
$$E_{avg}^P(\lambda) = E_0^P \times \frac{1 - 10^{-\varepsilon_{NO_3} \times [NO_3] \times z}}{\varepsilon_{NO_3} \times [NO_3] \times z \times \ln(10)} \quad (\text{S4})$$

35 Here,  $k_{tot}$  and  $k'_d$  are the total and photolysis pseudo first-order degradation rate constants (1/s),  
36  $k_{\bullet\text{OH},C}$  is the second-order reaction rate constant of the compound with  $\bullet\text{OH}$  (1/Ms),  $E_0^P$  and  $E_{avg}^P$   
37 are the average photonic fluence rate inside the reactor without and with  $\text{NO}_3^-$  respectively  
38 ( $\text{E}/\text{s}/\text{cm}^2$ ),  $\varepsilon$  molar absorption coefficient (1/Mcm) and  $\Phi$  is the quantum yield for direct  
39 photolysis (mol/E).

40 Total time-based degradation rate constant ( $k_{tot}$ ) of contaminants was calculated for two relevant  
41 values of  $k_{\bullet\text{OH},C}$  ( $8 \times 10^9$  and  $1 \times 10^{10}$  1/Ms), over a wide range of  $k_{UV}$  and  $\text{NO}_3^-$  concentrations  
42 (Figure S3). Steady state  $\bullet\text{OH}$  concentration was taken from Keen et al.

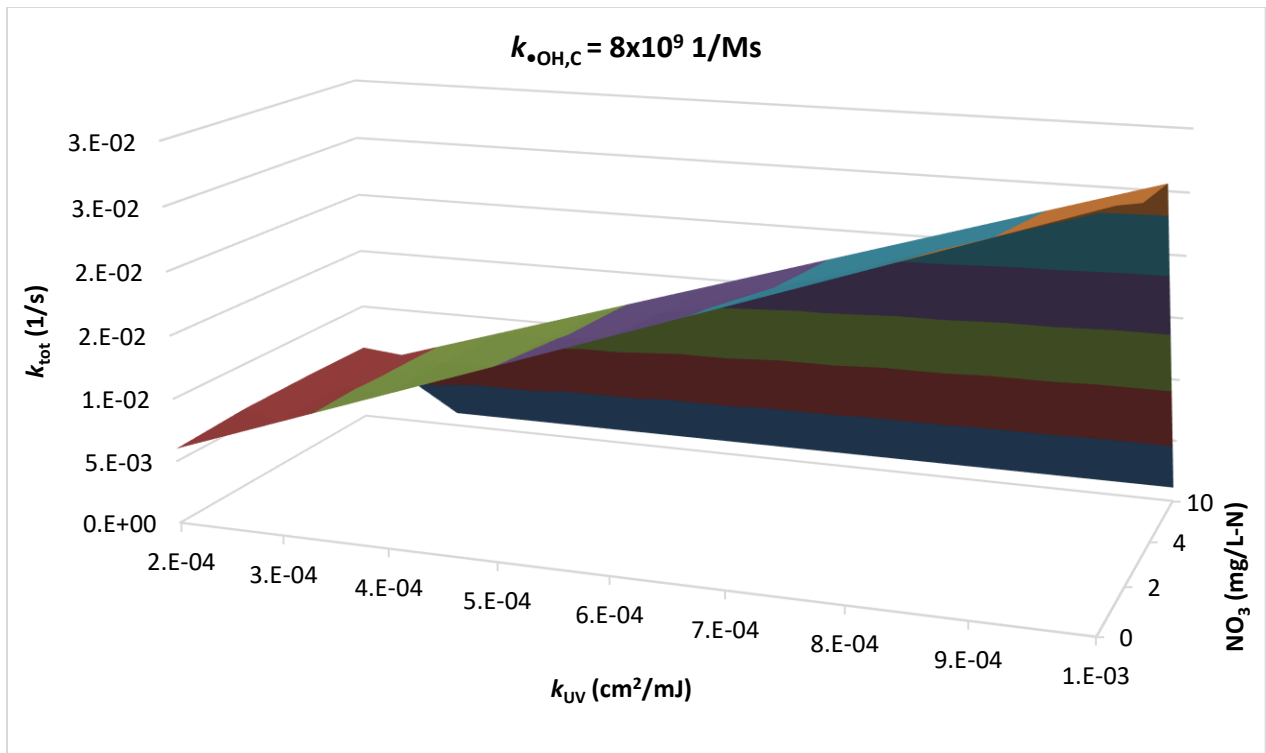

43

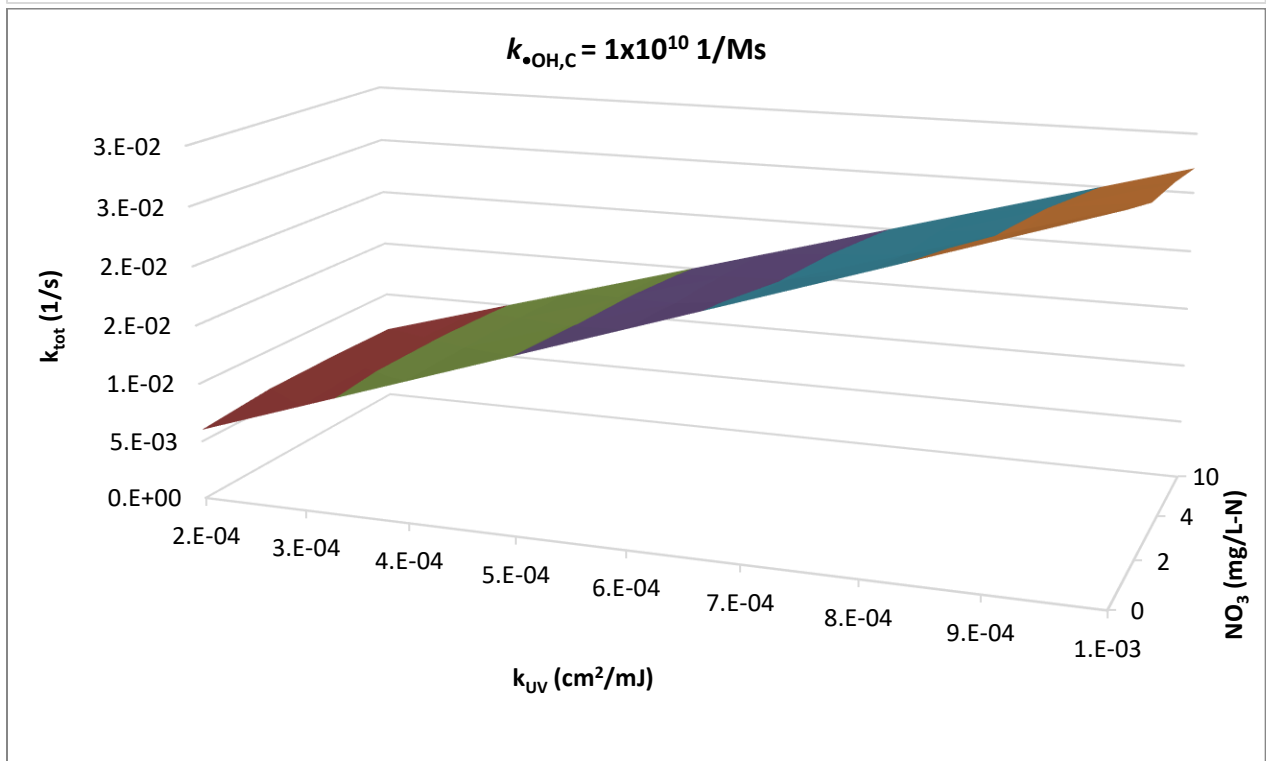

44

45 **Figure S3.** Total time-based degradation rate constants ( $k_{\text{tot}}$ ) of Group II contaminants as  
 46 function of their  $k_{\text{UV}}$  and  $\text{NO}_3^-$  concentration, for  $k_{\bullet\text{OH,C}}$  of  $8 \times 10^9$  (upper graph) and  $1 \times 10^{10}$  1/Ms  
 47 (lower graph).

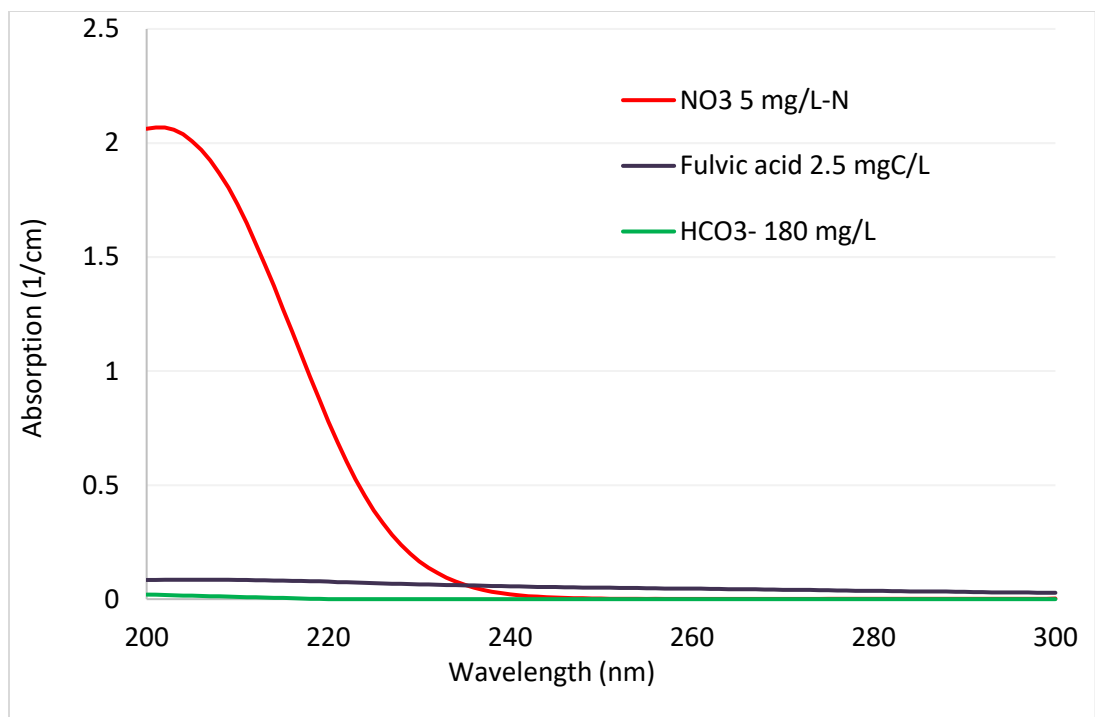

48

49 **Figure S4.** Light absorption spectrum of NO<sub>3</sub><sup>-</sup> (5 mg/L-N), fulvic acid (2.5 mgC/L) and HCO<sub>3</sub><sup>-</sup>  
50 (180 mg/L)  
51
